# Supplementary material for: Directed regio- and stereoselective hydroformylation of mono- and 1,3-disubstituted allylic alcohols: a catalytic approach to the anti-aldol-retronElectronic supplementary information (ESI) available: experimental. See http://www.rsc.org/suppdata/cc/b3/b311378g/
Source: Royal Society of Chemistry journal article supplement (doi:10.1039/b311378g), 2003-12-19
Supplement: b311378g.doc [file b311378g.doc]

**Electronic Supplementary Information**

**Directed regio- and stereoselective hydroformylation of mono- and 1,2-disubstituted allylic alcohols: A catalytic approach to the *anti*-aldol-retron**

**Bernhard Breit*, Peter Demel and Antje Gebert**

*Institut für Organische Chemie und Biochemie, Albert-Ludwigs-Universität Freiburg, Albertstr. 21, 79104 Freiburg, Germany. Fax: 0049-761-2038715; E-mail: bernhard.breit@organik.chemie.uni-freiburg.de*

**General Information**. Reactions were performed in flame-dried glassware under argon (purity >99.99998 %). The solvents were dried by standard procedures, distilled, and stored under argon. All temperatures quoted are not corrected. 1H NMR spectra were recorded on Bruker DRX 500 (500 MHz), Bruker AM 400 (400 MHz) and Varian Mercury 300 HFCP (300 MHz) spectrometers and are reported in ppm with tetramethylsilane (TMS), CHCl3 or C6­H6 as internal standards. Data are reported as follows: (s = singlet, d = doublet, t = triplet, q = quartet, q = quintet, m = multiplet, m*c* = centrosymmetric multiplet; coupling constant(s) in Hz; integration; assignment). Proton decoupled 31P NMR were recorded on a Varian Mercury 300 HFCP (300 MHz) spectrometer with H3PO4 as external standard. 13C NMR were recorded on Bruker DX 500 (125.7 MHz) or Bruker AM 400 (100.6 MHz) and are reported in ppm from CDCl3 internal standard (77.0 ppm). Melting points: Dr. Tottoli (Büchi) melting point apparatus. Elemental analysis: Elementaranalysen GmbH elementar vario EL. Hydroformylation reactions were carried out in a Premex reactor stainless steel pressure vessel equipped with a pressure gauge, inlet pipe, gas inlet, sample riser and pressure release valve. Synthesis gas [1:1 mixture of H2 and CO (purity: H2:4.3, CO: 3.1)] was purchased from Messer-Griesheim.

**General procedure for the directed hydroformylation.** To a solution of the substrate in dry toluene was added [Rh(acac)(CO)2] and stirred at room temperature for 10 min (exclusion of air and moisture). Afterwards P(OPh)3 was added and the reaction mixture was stirred for further 10 min, before it was transferred to an oven-dried 50 mL stainless steel autoclave that had been vented with argon. The apparatus was pressurized to ~20 bar with 1/1 CO/H2 and vented. This procedure was repeated three times and then the autoclave was pressurized to 40 bar with 1/1 CO/H2. The apparatus was heated by immersion into a copper block controlled by a polystat cc3 thermostat set at 30 °C. The solution was stirred by an internal aeration stirrer for 1-4 days and the reaction was monitored by 1H NMR.

**Table 2, Entry 1, R = Et.**

Scale: 410 mg (1.06 mmol, 1.0 eq.) *o*-DPPB-ester**,** 4.9 mg (19 x 10-3 mmol, 1.8 mol%) [Rh(CO)2acac]**,** 9.8 mg (32 x 10-3 mmol, 3.0 mol%) P(OPh)3**,** 7 mL toluene.

Conversion 90 %, rs 91:9, dr 95:5, **4**: 3 %.

Crude 1H NMR in CDCl3:

A

**Analytical data of 1**

**1H-NMR (300.064 MHz, CDCl3)**

δ = 0.83 (t, *J* = 7.5 Hz, 3H, CH2-C*H*3), 0.87 (t, *J* = 7.5 Hz, 3H, 4-H), 1.45-1.69 (m, 4H, 3-H, C*H*2-CH3 ), 2.36 (m*c*, 1H, 2-H), 5.28 (dt, *J* = 6.6 Hz, 6.6 Hz, 1H, 1-H), 6.92 (m*c*, 1H, Ar-H), 7.19-7.41 (m, 12H, Ar-H), 8.05 (m*c*, 1H, Ar-H), 9.57 (d, *J* = 3.4 Hz, 1H, (C=O)-H).

**13C-NMR (100.624 MHz, CDCl3)**

δ = 9.7 (4-C), 11.7 (CH2-*C*H3), 19.2 (3-C), 25.3 (*C*H2-CH3), 56.4 (2-C), 75.2 (1-C), 128.3 (Ar-C), 128.6 (3*J*C,P = 7.0 Hz, 4C, Ar-C), 128.7 (2C, Ar-C), 130.7 (3*J*C,P = 2.1 Hz, Ar-C), 132.2 (Ar-C), 133.9 (2*J*C,P = 20.6 Hz, 2C, Ar-C), 134.0 (2*J*C,P = 20.6 Hz, 2C, Ar-C), 134.4 (Ar-C), 135.3 (Ar-C), 138.0 (1*J*C,P = 13.3 Hz, Ar-C), 138.0 (1*J*C,P = 11.2 Hz, Ar-C), 140.9 (1*J*C,P = 27.9 Hz, Ar-C), 166.2 (3*J*C,P = 2.7 Hz, (Ar)COOR), 203.3 (CHO).

**31P-NMR (121.468 MHz, CDCl3)**

δ = -4.1 (s).

**Table 2, Entry 2, R = Bn.**

Scale: 590 mg (1.30 mmol, 1.0 eq.) *o*-DPPB-ester, 6.0 mg (23 x 10-3 mmol, 1.8 mol%) [Rh(CO)2acac], 14 mg (45 x 10-3 mmol, 3.5 mol%) P(OPh)3, 7 mL toluene.

Conversion 90 %, rs 90:10, dr 98:2, **9**: <3 %.

Crude 1H NMR in C6D6:

**Analytical data of 6**

**1H-NMR (300.064 MHz, C6D6)**

δ = 0.55 (t, *J* = 7.5 Hz, 3H, 4-H), 1.32-1.49 (m, 2H, 3-H), 2.17 (ddt, *J* = 8.79 Hz, 5.28 Hz, 3.66 Hz, 1H, 2-H), 2.72 (dd, *J* = 13.77 Hz, 7.77 Hz, 1H, Ph-C*Ha*) 2.81 (dd, *J* = 13.91 Hz, 6.44 Hz, 1H, Ph-C*Hb*), 5.51 (ddd, *J* = 7.76 Hz, 6.45 Hz, 3.95 Hz, 1H, 1-H), 6.90-7.17 (m, 14H, Ar-H), 7.31-7.40 (m, 4H, Ar-H), 7.95-8.01 (m, 1H, Ar-H), 9.51 (d, *J* = 3.22 Hz, 1H, CHO).

**13C-NMR (100.624 MHz, CDCl3)**

δ = 11.7 (4-C), 18.5 (3-C), 38.4 (*C*H2-Ar), 55.2 (2-C), 75.1 (1-C), 126.9 (Ar-C), 128.3 (3C, Ar-C), 128.6 (3*J*C,P = 7.3 Hz, 4C, Ar-C), 128.8 (2C, Ar-C), 129.7 (2C, Ar-C), 130.7 (3*J*C,P = 2.9 Hz, Ar-C), 132.2 (Ar-C), 134.0 (2*J*C,P = 20.3 Hz, 2C, Ar-C), 134.2 (2*J*C,P = 20.4 Hz, 2C, Ar-C), 134.4 (Ar-C), 134.9 (2*J*C,P = 10.2 Hz, Ar-C), 136.4 (Ar-C), 137.8 (1*J*C,P = 8.7 Hz, Ar-C), 138.0 (1*J*C,P = 10.2 Hz, Ar-C), 140.9 (1*J*C,P = 27.6 Hz, Ar-C), 166.1 ((Ar)COOR), 203.2 (CHO).

**31P-NMR (121.468 MHz, C6D6)**

δ = -4.2 (s).

**Table 2, Entry 3, (*cis*) R = Bn.**

Scale: 220 mg (0.488 mmol, 1.0 eq.) *o*-DPPB-ester, 2.2 mg (8.8 x 10-3 mmol, 1.8 mol%) [Rh(CO)2acac], 6.5 mg (21 x 10-3 mmol, 4.3 mol%) P(OPh)3, 5 mL toluene.

Conversion 40 %, rs 61:39, dr 58:42, **14**: 39 %.

Crude 1H NMR in CDCl3:

**Analytical data of 11**

**1H-NMR (300.064 MHz, CDCl3)**

δ = 0.78 (t, *J* = 7.3 Hz, 3H, 4-H), 1.55-1.72 (m, 2H, 3-H), 2.17 (d, *J* = 7.3 Hz, 2H, C*H*2*-*Ph), 2.79-2.90 (m, 1H, 2-H), 5.46 (m*c*, 1H, 1-H), [5.53-5.64 (m, 1H, 1-H)], 6.87 (m*c*, 1H, Ar-H), 7.05-7.50 (m, 17H, Ar-H), 8.33 (m*c*, 1H, Ar-H), 9.53 (d, *J* = 3.5 Hz, 1H, CHO).

**31P-NMR (121.468 MHz, C6D6)**

δ = - 4.2 (s).

**Table 2, Entry 4, R = EtO2CCH2.**

Scale: 223 mg (0.500 mmol, 1.0 eq.) *o*-DPPB-ester, 2.3 mg (9.0 x 10-3 mmol, 1.8 mol%) [Rh(CO)2acac], 4.7 mg (15.0 x 10-3 mmol, 3.0 mol%) P(OPh)3, 6 mL toluene.

Conversion 90 %, rs 92:8, dr 92:8, **19**: 5 %.

Crude 1H NMR in C6D6:

**Analytical data of 16**

**1H-NMR (300.064 MHz, C6D6)**

δ = 0.69 (t, 7.5 Hz, 3H, 4-H), 0.94 (t, *J* = 7.2 Hz, 3H, CH2-C*H*3), 1.18-1.48 (m, 2H, 3-H), 2.29 (m*c*, 1H, 2-H), 2.43 (dd, *J* = 16.1 Hz, 5.7 Hz, 1H, 1’-H*a*) 2.54 (dd,16.1 Hz, *J* = 7.6 Hz, 1H, 1’-H*b*), 3.91 (dq, *J* = 7.2 Hz, 2.9 Hz, 2H, C*H*2-O), 5.84 (ddd, *J* = 7.6 Hz, 5.7 Hz, 4.5 Hz, 1H, 1-H), 6.90-7.16 (m, 9H, Ar-H), 7.35-7.44 (m, 4H, Ar-H), 8.13 (m*c*, 1H, Ar-H), {9.36 (d, *J* = 1.9 Hz, 1H, CHO)}, 9.37 (d, *J* = 2.9 Hz, 1H, CHO).

**13C-NMR (100.614 MHz, CDCl3)**

δ = 11.7 (4-C), 14.1 (*C*H3-CH2), 19.1 (3-C), 36.9 (1’-C), 56.1 (2-C), 60.9 (O-*C*H2), 70.2 (1-C), 128.4 (Ar-C), 128.6 (3*J*C,P = 7.3 Hz, 4C, Ar-C), 128.7 (2C, Ar-C), 130.9 (Ar-C), 132.3 (Ar-C), 133.9 (2*J*C,P = 14.5 Hz, 2C, Ar-C), 134.1 (2*J*C,P = 16.0 Hz, 2C, Ar-C), 134.5 (Ar-C), 135.0 (Ar-C), 137.8 (1*J*C,P = 11.6 Hz, Ar-C), 137.9 (1*J*C,P = 11.6 Hz, Ar-C), 140.7 (1*J*C,P = 27.6 Hz, Ar-C), 165.8 ((Ar)COOR), 169.7 (2’-C), 202.4 (CHO).

**31P-NMR (121.468 MHz, CDCl3) of 16**

δ = -4.5 (s).

**Table 2, Entry 5, R = *i*-Pr.**

Scale: 500 mg (1.24 mmol, 1.0 eq.) *o*-DPPB-ester, 5.7 mg (22.0 x 10-3 mmol, 1.8 mol%) [Rh(CO)2acac], 13.3 mg (43.0 x 10-3 mmol, 3.4 mol%) P(OPh)3, 7 mL toluene.

Conversion 91 %, rs 98:2, dr 87:13, **24**: 3 %.

Crude 1H NMR in C6D6:

**Analytical data of 21**

**1H-NMR (300.064 MHz, C6D6)**

δ = 0.71 (t, *J* = 7.5 Hz, 3H, 4-H), 0.76 (d, *J* = 6.7 Hz, 3H, *i-*Pr-Me), 0.77 (d, *J* = 6.7 Hz, 3H, *i-*Pr-Me), 1.35-1.55 (m, 2H, 3-H2), 1.77 (dsept, *J* = 6.7 Hz, 6.7 Hz, 1H, *i-*Pr-H), 2.27 (m, 1H, 2-H), 5.18 (dd, *J* = 5.5 Hz, 7.6 Hz, 1H, 1-H), 6.95-7.20 (m, 9H, Ar-H), 7.42 (m*c*, 4H, Ar-H), 8.16 (m*c*, 1H, Ar-H), 9.57 (d, *J* = 3.7 Hz, 1H, CHO).

**13C-NMR (100.624 MHz, CDCl3)**

δ = 11.6 (4-C), 18.3 (*i-*Pr-Me), 18.5 (*i-*Pr-Me), 19.8 (3-C), 30.7 (*i-*Pr-C), 55.3 (2-C), 78.7 (1-C), 127.8 (Ar-C), 128.0 (2C, Ar-C), 128.2 (2C, Ar-C), 128.7 (2C, Ar-C), 130.9 (Ar-C), 132.2 (Ar-C), 134.3 (2*J*C,P = 17.4 Hz, 2C, Ar-C), 134.5 (2*J*C,P = 14.5 Hz, 2C, Ar-C), 134.9 (Ar-C), 135.1 (1*J*C,P = 11.6 Hz, Ar-C), 138.88 (1*J*C,P = 13.1 Hz, Ar-C), 138.93 (1*J*C,P = 11.6 Hz, Ar-C), 141.8 (1*J*C,P = 29.1 Hz, Ar-C), 166.1 ((Ar)COOR), 202.1 (CHO).

**31P-NMR (121.468 MHz, C6D6)**

δ = - 3.7 (s).

**Table 2, Entry 6, R = EtO2CCH3CH.**

Scale: 500 mg (1.04 mmol, 1.0 eq.) *o*-DPPB-ester **14**, 5.1 mg (20 x 10-3 mmol, 1.9 mol%) [Rh(CO)2acac], 9.2 mg (31 x 10-3 mmol, 3.0 mol%) P(OPh)3, 7 mL toluene.

Conversion 95 %, rs 90:10, dr 91:9, **29**: 7 %.

Crude 1H NMR in CDCl3:

**Analytical data of 26**

**1H-NMR (300.064 MHz, CDCl3)**

δ = 0.80-0.91 (m, 6H, 2’-H, 4-H), 1.15 (t, *J* = 7.2 Hz, 3H, CH2-C*H*3), 1.23-1.35 (m, 2H, 3-H2), 2.44 (m*c*, 1H, 2-H), 2.83 (qd, *J* = 7.3 Hz, 7.3 Hz, 1H, 1’-H), 4.04 (q, *J* = 7.0 Hz, 2H, C*H*2-O), 5.55 (dd, *J* = 7.5 Hz, 4.5 Hz, 1H, 1-H), [5.60-5.70 (m, 1H, 1-H)], 6.91 (m, 1H, Ar-H), 7.15-7.41 (m*c*, 12H, Ar-H), 8.02 (m*c*, 1H, Ar-H), 9.46 (d, *J* = 3.8 Hz, 1H, CHO).

**31P-NMR (121.468 MHz, CDCl3)**

δ = -4.3 (s).

**Table 3, Entry 1, R = Me.**

Scale: 500 mg (1.39 mmol, 1.0 eq.) *o*-DPPB-ester, 6.4 mg (25.0 x 10-3 mmol, 1.8 mol%) [Rh(CO)2acac], 13.0 mg (42.0 x 10-3 mmol, 3.0 mol%) P(OPh)3, 10 mL toluene.

Conversion >97 %, rs 64:36, dr 91:9, **34**: 5 %.

Crude 1H NMR in CDCl3:

1H NMR of **31** purified by column chromatography:

**Analytical data of 31**

**1H-NMR (300.064 MHz, CDCl3)**

δ = 1.06 (d, *J* = 7.2 Hz, 3H, 1-Me), 1.20 (d, *J* = 6.4 Hz, 3H, 2-Me), 2.48-2.62 (m, 1H, 2-H), 5.33 (qd, *J* = 6.4 Hz, 6.4 Hz, 1H, 1-H), 6.91 (m*c*, 1H, Ar-H), 7.21-7.43 (m, 12H, Ar-H), 8.00 (m*c*, 1H, Ar-H), 9.59 (d, *J* = 2.1 Hz, 1H, CHO).

**13C-NMR (100.624 MHz, CDCl3)**

δ = 9.8 (2-Me), 17.1 (1-Me), 50.6 (2-C), 71.3 (1-C), 128.2 (Ar-C), 128.5 (3*J*C,P = 7.3 Hz, 4C, Ar-C), 128.6 (2C, Ar-C), 130.5 (Ar-C), 132.0 (Ar-C), 133.8 (2*J*C,P = 20.4 Hz, 2C, Ar-C), 134.0 (2*J*C,P = 20.3 Hz, 2C, Ar-C), 134.3 (Ar-C), 134.9 (1*J*C,P = 10.2 Hz, Ar-C), 137.9 (2*J*C,P = 17.4 Hz, 2C, Ar-C), 140.3 (1*J*C,P = 27.6 Hz, Ar-C), 166.1 ((Ar)COOR), 202.1 (3-C).

**31P-NMR (121.468 MHz, CDCl3)**

δ = -3.9 (s).

**Table 3, Entry 2, R = *i*-Pr.**

Scale: 400 mg (1.03 mmol, 1.0 eq.) *o*-DPPB-ester, 5.0 mg (19.0 x 10-3 mmol, 1.8 mol%) [Rh(CO)2acac], 10.0 mg (31.0 x 10-3 mmol, 3.0 mol%) P(OPh)3, 10 mL toluene.

Conversion 90 %, rs 86:14, dr 95:5, **39**: 3 %.

Crude 1H NMR in C6D6:

1H NMR of **36** purified by column chromatography :

**Analytical data of 36**

**1H-NMR (300.064 MHz, CDCl3)**

δ = 0.85 (d, *J* = 6.6 Hz, 3H, *i-*Pr-Me), 0.88 (d, *J* = 6.3 Hz, 3H, *i-*Pr-Me), 1.02 (d, *J* = 7.0 Hz, 3H, 2-Me), 1.86 (sept d, *J* = 6.9 Hz, 6.9 Hz, 1H, *i-*Pr-H), 2.62 (dqd, *J* = 7.0 Hz, 5.7 Hz, 2.8 Hz, 1H, 2-H), 5.14 (dd, *J* = 6.6 Hz, 5.7 Hz, 1H, 1-H), 6.93 (m*c*, 1H, Ar-H), 7.22-7.44 (m, 12H, Ar-H), 8.05 (m*c*, 1H, Ar-H), 9.57 (d, *J* = 2.6 Hz, 1H, (C=O)-*H*).

**13C-NMR (100.624 MHz, CDCl3)**

δ = 11.0 (*i-*Pr-Me), 17.7 (*i-*Pr-Me), 19.2 (2-Me), 30.0 (*i-*Pr-C), 48.3 (2-C), 79.2 (1-C), 128.3 (Ar-C), 128.6 (3*J*C,P = 7.3 Hz, 4C, Ar-C), 128.7 (2C, Ar-C), 130.7 (3*J*C,P = 2.9 Hz, Ar-C), 132.2 (Ar-C), 134.0 (2*J*C,P = 13.1 Hz, 2C, Ar-C), 134.2 (2*J*C,P = 11.6 Hz, 2C, Ar-C), 134.4 (Ar-C), 135.6 (1*J*C,P = 10.2 Hz, Ar-C), 138.45 (1*J*C,P = 11.6 Hz, Ar-C), 138.48 (1*J*C,P = 11.6 Hz, Ar-C), 141.2 (1*J*C,P = 27.6 Hz, Ar-C), 166.3 ((Ar)COOR), 202.9 (3-C).

**31P-NMR (121.468 MHz, CDCl3) of 36**

δ = -3.9 (s).

**Table 3, Entry 3, R = EtO2CCH3CH**

Scale: 55 mg (0.12 mmol, 1.0 eq.) *o*-DPPB-ester, 0.6 mg (2.0 x 10-3 mmol, 1.9 mol%) [Rh(CO)2acac], 1.1 mg (4.0 x 10-3 mmol, 3.0 mol%) P(OPh)3, 4 mL toluene.

Conversion 90 %, rs 83:17, ds 86:14, **44**: 8 %.

Crude 1H NMR in CDCl3:

**Analytical data of 41**

**1H-NMR (300.064 MHz, CDCl3)**

δ = 1.04 (d, *J* = 7.2 Hz, 3H, 3-H), 1.11 (d, *J* = 7.2 Hz, 3H, 2’-H), 1.17 (t, *J* = 7.2 Hz, 3H, CH2-C*H*3), 2.59-2.73 (m, 1H, 2-H), 2.88 (qd, *J* = 7.2 Hz, 7.2 Hz, 1H, 1’-H), 4.08 (q, *J* = 7.2 Hz, 2H, C*H*2-O), 5.56 (d, *J* = 5.3 Hz, 7.2 Hz, 1H, 1-H), 6.91 (m*c*, 1H, Ar-H), 7.12-7.67 (m, 12H, Ar-H), 8.02 (m*c*, 1H, Ar-H), 9.50 (d, *J* = 2.4 Hz, 1H, CHO).

**31P-NMR (121.468 MHz, CDCl3)**

δ = -4.3 (s).

**Table 3, Entry 4, R = oxazolidinone**

Scale: 200 mg (0.378 mmol, 1.0 eq.) *o*-DPPB-ester, 2.0 mg (8.0 x 10-3 mmol, 2.0 mol%) [Rh(CO)2acac], 3.5 mg (11 x 10-3 mmol, 3.0 mol%) P(OPh)3 , 4 mL toluene.

Conversion 92 %, rs 84:16, dr 88:12, **48**: 19 %.

Crude 1H NMR in CDCl3:

1H NMR of **45** purified by column chromatography :

**Analytical data of 45**

**1H-NMR (300.064 MHz, CDCl3)**

δ = 0.80 (d, *J* = 6.9 Hz, 3H, *i*-Pr-Me), 0.82 (d, *J* = 7.0 Hz, 3H, *i*-Pr-Me), 1.14 (d, *J* = 7.3 Hz, 3H, 2’-Me), 1.22 (d, *J* = 6.9 Hz, 3H, 1’’-Me), 2.13 (sept d, *J* = 6.9 Hz, 4.3 Hz, 1H, *i*-Pr-H), 2.72 (dqd, *J* = 7.2 Hz, 7.2 Hz, 2.8 Hz, 1H, 2’-H), 3.80 (dt, *J* = 6.7 Hz, 3.5 Hz, 1H, 4-H), 3.94 (m*c*, 2H, 5-H), 4.18 (qd, *J* = 6.9 Hz, 3.8 Hz, 1H, 1’’-H), 5.71 (dd, *J* = 8.6 Hz, 3.5 Hz, 1H, 1’-H) 6.88 (m*c*, 1H, Ar-H), 7.14-7.44 (m, 12H, Ar-H), 8.06 (m*c*, 1H, Ar-H), 9.51 (d, *J* = 2.8 Hz, 1H, 3’-H).

**13C-NMR (125.725 MHz, CDCl3)**

δ = 10.1 (2’-Me), 10.3 (4’-Me), 15.4 (*i-*Pr-Me), 18.1 (*i-*Pr-Me), 29.1 (*i-*Pr-C), 39.1 (2’-C), 48.0 (4’-C), 59.3 (4-C), 64.2 (5-C), 73.3 (3’-C), 128.38 (Ar-C), 128.4 (3*J*C,P = 6.9 Hz, 2C, Ar-C), 128.6 (3*J*C,P = 7.0 Hz, 2C, Ar-C), 128.8 (2C, Ar-C), 131.0 (3*J*C,P = 2.4 Hz, Ar-C), 132.6 (Ar-C), 133.5 (2*J*C,P = 20.3 Hz, 2C, Ar-C), 134.2 (2*J*C,P = 20.9 Hz, 2C, Ar-C), 134.7 (Ar-C), 135.2 (1*J*C,P = 10.3 Hz, Ar-C), 138.0 (1*J*C,P = 12.4 Hz, Ar-C), 138.5 (1*J*C,P = 10.0 Hz, Ar-C), 140.9 (1*J*C,P = 27.6 Hz, Ar-C), 154.66 (2-C), 165.6 (3*J*C,P = 1.8 Hz, (Ar)COOR), 173.0 (1’-C), 201.5 (5’-C).

**31P-NMR (121.468 MHz, CDCl3)**

δ = -4.8 (s).

(2R*, 3R*)-2,4-dimethyl-pentane-1,3-diol (50)

To a suspension of 40 mg LiAlH4 (1.1 mmol, 4.4 eq.) in dry diethyl ether (6 mL) at 0 °C was added 100 mg **36** (0.24 mmol, 1.0 eq., *anti*:*syn* 95:5) in dry diethyl ether (2 mL) and stirred for 1 h at this temperature. Subsequent addition of water (40 µL), NaOH (15% in water, 40 µL) and water (120 µL), stirring of the white suspension for one hour at room temperature, filtration, washing the filter cake with diethyl ether (30 mL) and evaporation of the solvents gave the diol **50** as crude product. Column chromatography (cyclohexane/ethyl acetate 1:2) yielded the pure product **50** (20 mg, 0.15 mmol, 63%, *anti*:*syn* 95:5) as a colorless liquid.

**1H-NMR (300.064 MHz, CDCl3) of 50**

δ = 0.87 (d, *J* = 7.1 Hz, 3H, *i-*Pr-Me), 0.90 (d, *J* = 6.8 Hz, 3H, *i-*Pr-Me), 0.97 (d, *J* = 6.9 Hz, 3H, 2-Me), 1.78-1.89 (m, 2H, 2-H, 4-H), 2.40-3.00 (br s, 2H, 2 x OH), 3.34 (dd, *J* = 7.8 Hz, 3.8 Hz, 1H, 3-H), 3.64 (dd, *J* = 10.8 Hz, 7.2 Hz, 1H, 1-H*a*), 3.75 (dd, *J* = 10.6 Hz, 3.5 Hz, 1H, 1-H*b*).

**13C-NMR (100.624 MHz, CDCl3) of 50**

δ = 14.0 (*i-*Pr-Me), 15.1 (*i-*Pr-Me), 19.9 (2-Me), 30.4 (4-C), 37.3 (2-C), 68.1 (1-C), 82.0 (3-C).

The spectral data of the diol **50** correspond to those published previously.[[[1]](#footnote-2)]

(2S*, 4R*, 5S*)-4-isopropyl-5-methyl-2-phenyl-[1,3]dioxane (51)

A solution of 16 mg **50** (0.12 mmol, *anti*:*syn* 95:5) in CH2Cl2 (1 mL) was treated with 100 mg (0.66 mmol, 5.5 eq.) benzaldehyde dimethylacetal and one crystal of *p*-toluenesulfonic acid monohydrate and stirred for 1.5 days at rt. The reaction was stopped by addition of a saturated aqueous solution of NaHCO3 (1 mL) followed by extraction with dichloromethane (3x5 mL). Washing of the combined organic phases with brine, drying over MgSO4 and evaporation of the solvents under reduced pressure gave the crude product, which was further purified by column chromatography (cyclohexane/ethyl acetate 10:1) to give 15 mg of the desired product **51** (0.07 mmol, 66%, *anti*:*syn* 96:4) as a clear, colorless liquid. A ROESY/NOESY-analysis showed clearly the *trans*-configuration of the substituents at the 6-membered ring, thus being the proof for the *anti*-relation between C4 and C5.

**1H-NMR (300.064 MHz, C6D6)**

δ = 0.35 (d, *J* = 6.8 Hz, 3H, 5-Me), 0.93 (d, *J* = 6.9 Hz, 3H, *i-*Pr-Me), 1.06 (d, *J* = 6.9 Hz, 3H, *i-*Pr-Me), 1.72 (dsept, 2.2 Hz, 6.9 Hz, 1H, 7-H), 1.83 (m*c*, 1H, 5-H), 3.03 (dd, *J* = 2.2 Hz, 10.0 Hz, 1H, 4-H), 3.16 (dd, *J* = 11.1 Hz, 11.1 Hz, 1H, 6-H*a*), 3.89 (dd, *J* = 4.6 Hz, 11.1 Hz, 1H, 6-H*b*), 5.36 (s, 1H, 2-H), 7.11 (m*c*, 1H, Ar-H), 7.19 (m*c*, 2H, Ar-H), 7.65 (m*c*, 2H, Ar-H).

**13C-NMR (125.725 MHz, CDCl3)**

δ = 12.2 (5-Me), 15.1 (*i-*Pr-Me), 20.1 (*i-*Pr-Me), 28.7 (7-C), 31.1 (5-C), 73.3 (6-C), 87.1 (4-C), 101.1 (2-C), 126.1 (2C, Ar-C), 128.2 (2C, Ar-C), 128.6 (Ar-C), 139.2 (Ar-C).

### *rac*-(2*R**,3*S**)-2-Ethyl-4-phenyl-butan-1,3-diol (52)

To a suspension of 46 mg LiAlH4 (1.21 mmol, 3.7 eq.) in dry diethyl ether (4 mL) at 0 °C was added 160 mg **51** (0.33 mmol, 1.0 eq., *anti*:*syn* 93:7) in dry diethyl ether (2 mL) and stirred for 2 h at this temperature. After subsequent addition of water (46 µL), NaOH (15% in water, 46 µL) and water (132 µL), stirring of the white suspension for one hour at room temperature, filtration, washing the filter cake with diethyl ether (35 mL) and evaporation of the solvents gave the diol **52** as crude product. Column chromatography (pentane/diethyl ether 1:1) yielded the analytical pure product **52** (58 mg, 0.3 mmol, 91%, *anti*:*syn* 93:7) as a colorless liquid, which crystallized in white needles upon storage at 0 °C.

**1H NMR (400.136 MHz, CDCl3)**

 = 1.00 (t, *J* = 7.3 Hz, 3H, 6-H3), 1.55 (m, 3H, 2-H, 5-H2), 2.70 (bs, 2H, OH), 2.79 (dd, *J* = 13.8, 3.9 Hz, 1H, 4-H2), 2.98 (dd, *J* = 13.8, 3.9 Hz, 1H, 4-H2), 3.75 (dd, *J* = 11.2, 5.2 Hz, 1H, 1-H2), 3.93 (m, 1H, 3-H), 3.99 (dd, *J* = 11.2, 2.2 Hz, 1H, 1-H2), 7.30 (m, 5H, Ar-H).

**13C NMR (100.624 MHz, CDCl3)**

 = 11.7 [12.2] (6-C), 21.5 [18.5] (5-C), 42.3 [39.8] (2-C), 45.8 [45.5] (4-C), 63.5 [64.2] (1-C), 76.5 [76.3] (3-C), 126.6 [126.5], 128.7 (2C, Ar-C), 129.33 (2C, Ar-C) [129.26 (2C, Ar-C)], 138.4 (Ar-C).

The data in brackets correspond to the minor stereoisomer, as far as distinguishable.

Melting point: 64-67 °C.

Elemental analysis calcd. (%) for C12H18O2 (194.13): C 74.19, H 9.34; found (%) C 73.86, H 9.64. HR-MS (EI) calcd. for C12H16O (M+-H2O) (176.25): 176.1201; found: 176.1200.

### *rac*-(4*R**,5*S**)-4-Benzyl-5-ethyl-2-phenyl-[1,3]dioxane (53)

A solution of 21 mg **52** (0.11 mmol, *anti*:*syn* 93:7) in CH2Cl2/CDCl3 (2.6 mL, 3.3:1) was treated with 0.32 µL (32 mg, 0.22 mmol, 2.0 eq.) benzaldehyde dimethylacetal and one crystal of *p*-toluenesulfonic acid monohydrate and stirred for 6 days at rt. The reaction was stopped by addition of a saturated aqueous solution of NaHCO3 (10 mL) followed by extraction with dichloromethane (3x10 mL). Washing of the combined organic phases with brine, drying over MgSO4 and evaporation of the solvents under reduced pressure gave the crude product, which was further purified by column chromatography (petrol ether/TBME 30:1) to give 27 mg of the desired product **53** (0.096 mmol, 89%, *anti*:*syn* 92:8) as a clear, colorless liquid. A ROESY/NOESY-analysis showed clearly the *trans*-configuration of the substituents at the 6-membered ring, thus being the proof for the *anti*-relation between C4 and C5.

**1H-NMR (500.003 MHz, CDCl3)**

 = 0.86 (t, *J* = 7.5 Hz, 3H) [0.81 (t, *J* = 7.6 Hz, 3H)] (8-H3), 1.07 (m, 1H, 5-H), 1.53 (m, 1H, 7-H2), 1.68 (m, 1H, 7-H2), 2.78 (dd, *J* = 14.5, 8.2 Hz, 1H) [2.65 (dd, *J* = 14.5, 8.3 Hz, 1H)] (9-H2), 3.01 (dd, *J* = 14.5, 2.5 Hz, 1H) [2.91 (dd, *J* = 14.5, 2.5 Hz, 1H)] (9-H2), 3.49 (pt, *J* = 11.2 Hz, 1H) [3.25 (pt, *J* = 11.2 Hz, 1H)] (6-H2), 3.67 (ddd, *J* = 10.4, 8.2, 2.6 Hz, 1H) [3.43 (ddd, *J* = 11.1, 8.5, 2.6 Hz, 1H)] (4-H), 4.21 (dd, *J* = 11.2, 4.9 Hz, 1H) [4.03 (dd, *J* = 11.4, 4.8 Hz, 1H)] (6-H2), 5.33 (s, 1H), [5.43 (s, 1H)] (2-H), 7.20 (m, 8H, Ar-H), 7.36 (m, 2H, Ar-H).

**13C-NMR (125.725 MHz, CDCl3)**

 = 10.8 [11.9] (8-C), 20.8 [21.0] (7-C), 39.05 [38.9] (5/9-C), 39.49 [39.43] (5/9-C), 71.1 [70.7] (6-C), 82.3 [81.7] (4-C), 100.6 [98.7] (3-C), 126.0 (Ar-C), 126.1 (Ar-C) , 128.05 (2C, Ar-C), 128.07 (2C, Ar-C), 128.5 (2C, Ar-C), 129.7 (2C, Ar-C), 138.7 (Ar-C), 138.8 (Ar-C).

The data in brackets correspond to the minor stereo isomer, as far as distinguishable. Elemental analysis calcd. (%) for C19H22O2 (282.16): C 80.82, H 7.85; found (%) C 80.63, H 7.70.

1. Duthaler, R. O., Herold, P., Wyler-Helfer, S., Riediker, M., *Helv. Chim. Acta* **1990**, *73*, 659-673. [↑](#footnote-ref-2)
